# Supplementary material
Source: PubMed Central journal article supplement (PMC5860156)
Supplement: kwx251cowlingwebmaterialfinal.pdf [file kwx251cowlingwebmaterialfinal.pdf]

## Web Appendix

```
#####  
# Virus Interference Review by the Test-negative study  
# American Journal of Epidemiology  
# Confidence Intervals by Bootstrap  
#####
```

```
# Dataset could be downloaded from:  
https://www.dropbox.com/s/ayk27b6he9zwwsv/VirIntRev\_Fig3Data.dat?dl=0
```

```
library(metafor)
```

```
setwd() # set working directory where the dataset is saved  
load("VirIntRev_Fig3Data.dat")  
# dataset of 44 observations and 7 variables  
# dataset orders are the same with shown in Figure 3  
# author: first author  
# VE.FluNeg: point estimates of VE by influenza negative controls  
# VE.FluNeg.ll: lower confidence intervals of VE by influenza negative controls  
# VE.FluNeg.ul: upper confidence intervals of VE by influenza negative controls  
# VE.ORVPos: point estimates of VE by other respiratory virus positive controls  
# VE.ORVPos.ll: lower confidence intervals of VE by other respiratory virus positive controls  
# VE.ORVPos.ul: upper confidence intervals of VE by other respiratory virus positive controls
```

```
#=====Calculate beta and SE of covariate based on  
VE=====  
VirIntRev$Beta.FluNeg <- log(1-VirIntRev$VE.FluNeg/100)  
VirIntRev$SE.FluNeg <- (log(1-VirIntRev$VE.FluNeg.ll/100) - log(1-  
VirIntRev$VE.FluNeg.ul/100))/qnorm(0.975)/2  
VirIntRev$Beta.ORVPos <- log(1-VirIntRev$VE.ORVPos/100)  
VirIntRev$SE.ORVPos <- (log(1-VirIntRev$VE.ORVPos.ll/100) - log(1-  
VirIntRev$VE.ORVPos.ul/100))/qnorm(0.975)/2
```

```
#=====Calculate delta VE and Confidence  
Intervals=====  
VirIntRev$Delta.VE <- round(VirIntRev$VE.FluNeg - VirIntRev$VE.ORVPos, 0)  
## Delta VE as difference between VE(FLU-) and VE(ORV+)
```

```
set.seed(0725)  
N.Sample <- 1000 # 1000 times bootstrap  
Delta.VE.ll <- Delta.VE.ul <- rep(NA, N.Sample)  
## 1000 times bootstrap estimates of confidence intervals  
Meta.Delta.VE.Mean <- Meta.Delta.VE.SE <- rep(NA, N.Sample)  
## Calculate mean and standard error of each Delta VE for meta-analysis
```

```
# Bootstrap  
for(i in 1:nrow(VirIntRev)){  
  for(j in 1:N.Sample){
```

```

VE.FluNeg <- (1-exp(rnorm(1000, VirIntRev$Beta.FluNeg[i], VirIntRev$SE.FluNeg[i]))) * 100
VE.ORVPos <- (1-exp(rnorm(1000, VirIntRev$Beta.ORVPos[i], VirIntRev$SE.ORVPos[i]))) * 100

Delta.VE.ll[j] <- quantile(VE.FluNeg - VE.ORVPos, 0.025, na.rm=TRUE)
Delta.VE.ul[j] <- quantile(VE.FluNeg - VE.ORVPos, 0.975, na.rm=TRUE)

Meta.Delta.VE.Mean[j] <- mean(VE.FluNeg - VE.ORVPos)
Meta.Delta.VE.SE[j] <- sd(VE.FluNeg - VE.ORVPos)
}

VirIntRev$Delta.VE.ll[i] <- round(mean(Delta.VE.ll), 0)
VirIntRev$Delta.VE.ul[i] <- round(mean(Delta.VE.ul), 0)

VirIntRev$Meta.Delta.VE.Mean[i] <- round(mean(Meta.Delta.VE.Mean), 0)
VirIntRev$Meta.Delta.VE.SE[i] <- round(mean(Meta.Delta.VE.SE), 3)

}# end of loop

VirIntRev$Delta.VE.CI <- paste(VirIntRev$Delta.VE, "% (", VirIntRev$Delta.VE.ll, "%, ",
VirIntRev$Delta.VE.ul, "%)", sep="")
VirIntRev$Delta.VE.CI

# Meta-analysis
index.AorB <- c(2, 3, 4, 9, 10, 11, 12, 13, 14, 16, 17, 18, 19, 20, 21, 25, 26, 27, 29, 30, 31)
## Pool Delta VE against influenza A or B

Meta <- list()
Meta$Model <- rma(yi = Meta.Delta.VE.Mean, sei = Meta.Delta.VE.SE, data =
VirIntRev[index.AorB, ], method="FE")
Meta$Delta.VE <- round(c(Meta$Model$b), 0)
Meta$Delta.VE.SE <- Meta$Model$sse
Meta$Delta.VE.ll <- round(Meta$Delta.VE + qnorm(0.025) * Meta$Delta.VE.SE, 0)
Meta$Delta.VE.ul <- round(Meta$Delta.VE + qnorm(0.975) * Meta$Delta.VE.SE, 0)
Meta$Delta.VE.CI <- paste(Meta$Delta.VE, "% (", Meta$Delta.VE.ll, "%, ", Meta$Delta.VE.ul, "%)",
sep="")
Meta$Delta.VE.CI

# end

```

Web Table 1. Summary of clinical case definitions and related symptoms from included published studies.

| <b>Study</b>           | <b>Clinical case definition</b> | <b>Clinical case definition symptoms</b>                                                                                                                                                                                                          |
|------------------------|---------------------------------|---------------------------------------------------------------------------------------------------------------------------------------------------------------------------------------------------------------------------------------------------|
| <b>Blyth et al.</b>    | ILI                             | At least 1 acute respiratory symptom or sign plus either a documented fever $\geq 37.5^{\circ}\text{C}$ or history of fever in the past 96 hours                                                                                                  |
| <b>Cowling et al.</b>  | ARI                             | Fever measured $\geq 38^{\circ}\text{C}$ with any respiratory symptom such as cough, runny nose, or sore throat                                                                                                                                   |
| <b>Feng et al.</b>     | ARI                             | Any two of the following reported symptoms: fever, cough, sore throat, rhinorrhea, and congestion                                                                                                                                                 |
| <b>Grijalva et al.</b> | Admission with pneumonia        | Admission with community-acquired pneumonia                                                                                                                                                                                                       |
| <b>Kelly et al.</b>    | ILI                             | A documented fever with oral (or aural) temperature $\geq 38^{\circ}\text{C}$ (or axillary temperature $> 37.5^{\circ}\text{C}$ ), with at least one acute respiratory symptom or sign                                                            |
| <b>Levy et al.</b>     | ILI                             | An acute upper respiratory tract infection characterised by fever, cough, and fatigue                                                                                                                                                             |
| <b>Nunes et al.</b>    | ILI                             | The European Union ILI case definition (Sudden onset of symptoms; at least one of four systemic symptoms: fever or feverishness, malaise, headache, myalgia; at least one of three respiratory symptoms: cough, sore throat, shortness of breath) |
| <b>Pierse et al.</b>   | SARI ILI                        | ILI: a history of fever (or measured temperature of $\geq 38^{\circ}\text{C}$ ) and cough<br>SARI: ILI + hospitalisazion                                                                                                                          |
| <b>Sullivan et al.</b> | ILI                             | Fever, cough and fatigue                                                                                                                                                                                                                          |
| <b>Sundaram et al.</b> | ARI                             | Included fever/feverishness or cough during most seasons                                                                                                                                                                                          |

---

|                         |            |                                                                                                                                                                                                                                                                                                                                                                                                                                                                                        |
|-------------------------|------------|----------------------------------------------------------------------------------------------------------------------------------------------------------------------------------------------------------------------------------------------------------------------------------------------------------------------------------------------------------------------------------------------------------------------------------------------------------------------------------------|
| <b>Suzuki et al.</b>    | ILI        | Sudden onset of fever and at least one of the following symptoms: cough, runny nose, sore throat, headache, myalgia, or fatigue                                                                                                                                                                                                                                                                                                                                                        |
| <b>van Doorn et al.</b> | ARI or ILI | <p>ILI: an acute onset of symptoms (full development of typical symptoms in <math>\leq 4</math> days) including a rectal temperature of at least 38 °C and at least one respiratory or systemic symptom (i.e. cough, nasal catarrh, sore throat, frontal headache, retrosternal pain, myalgia)</p> <p>ARI: an acute respiratory illness other than ILI, such as acute sinusitis or pneumonia, and with at least one of the following symptoms: coughing, rhinorrhea or sore throat</p> |

---

ARI: acute respiratory infection; ILI: influenza-like illness; SARI: severe acute respiratory infection

Web Figure 1. Comparison of all specific VE estimates by flu- and ORV+ control groups, restricted by 95% CI range for VE<sub>FLU-</sub> of ≤100 percentage points. VE:

Vaccine effectiveness; CI: confidence interval; ORV+: other respiratory virus positive

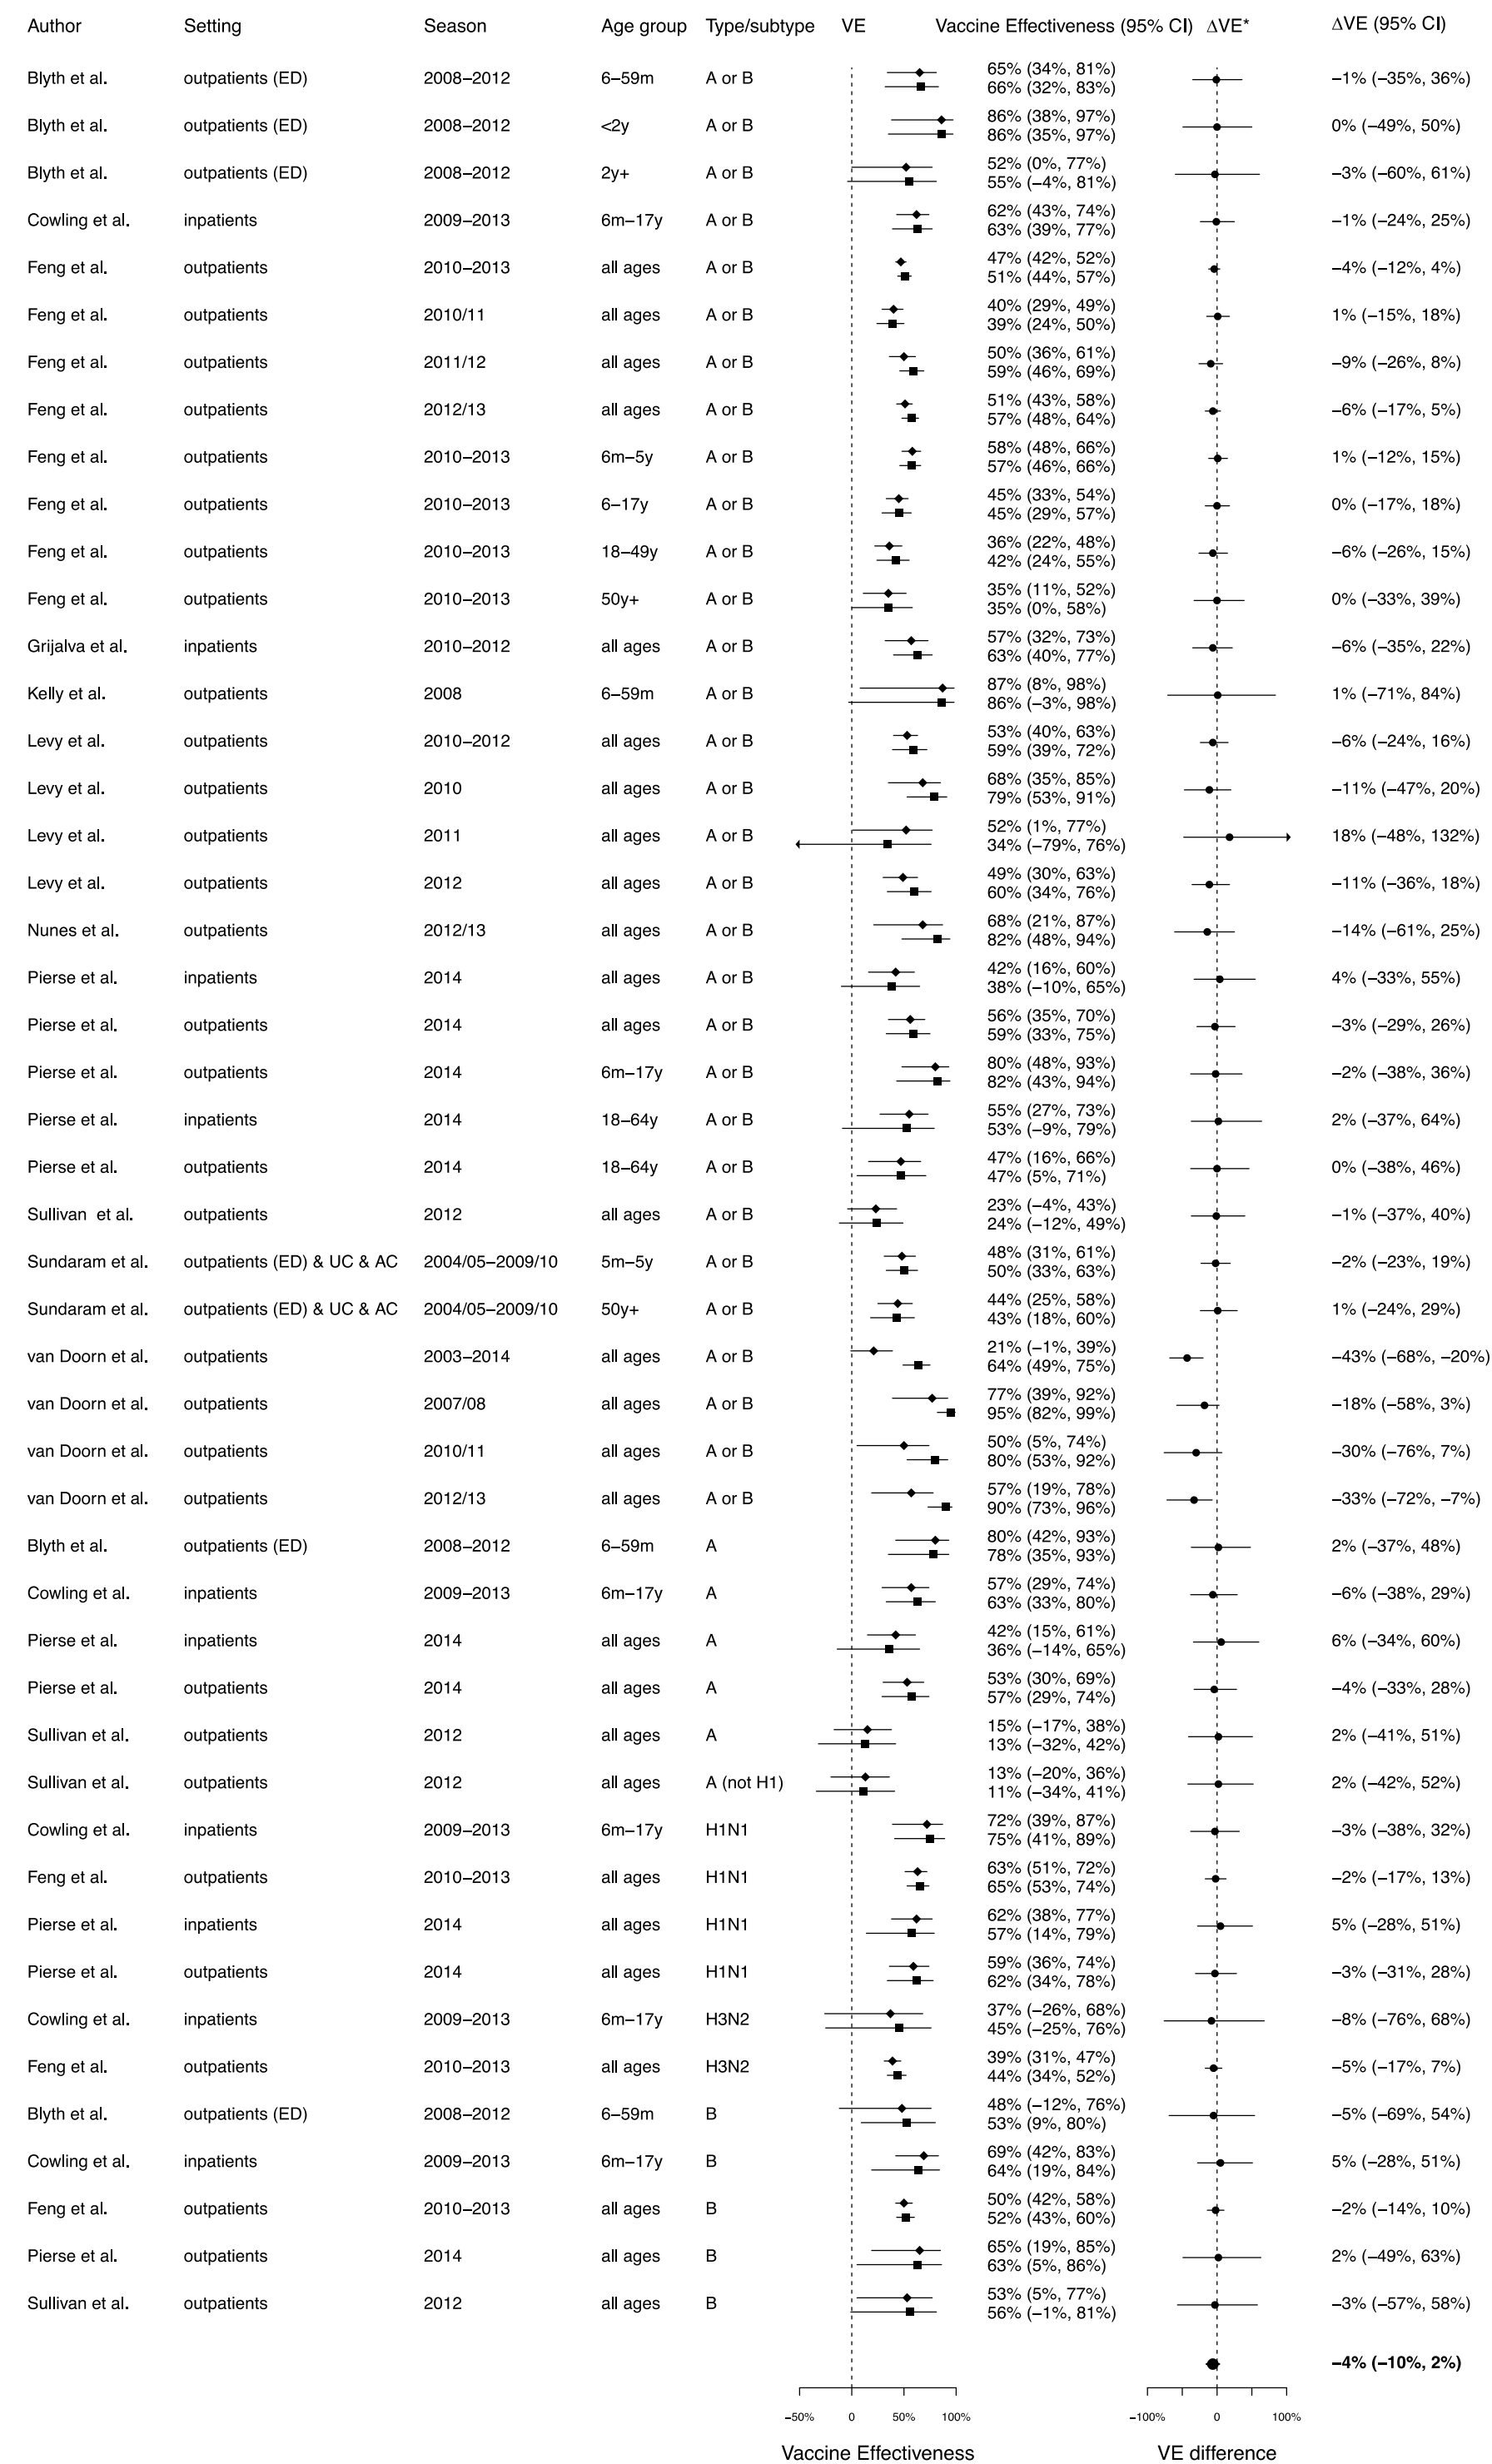

\* ΔVE (●) is defined as VE<sub>FLU-</sub> (◆) - VE<sub>ORV+</sub> (■)

Web Figure 2. Comparison of all specific VE estimates by flu- and ORV+ control groups, restricted by 95% CI range for VE<sub>FLU-</sub> of >100 percentage points. VE: Vaccine effectiveness; CI: confidence interval; ORV+: other respiratory virus positive

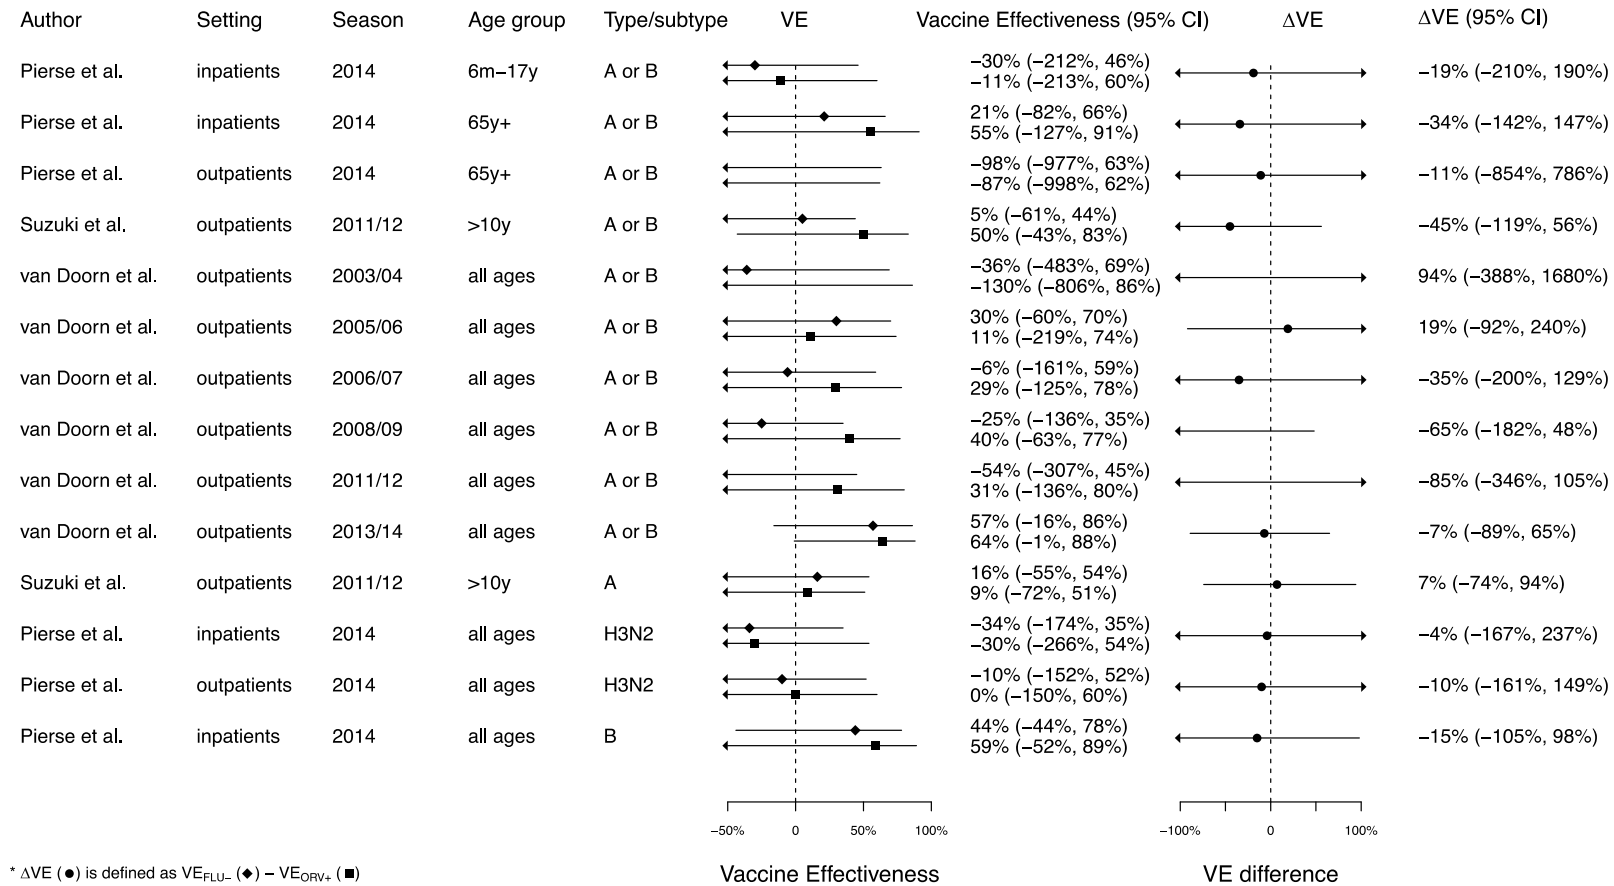

Web Table 2. Summary of estimates of covariates included in meta-regression.

| <b>Covariate</b>                           | <b>OR (95%CI)</b> | <b>p value</b> |
|--------------------------------------------|-------------------|----------------|
| <b>Univariate analysis</b>                 |                   |                |
| Setting (compared with inpatient)          |                   |                |
| Outpatient                                 | 1.27 (1.01, 1.60) | 0.043          |
| Mixed                                      | 1.37 (1.05, 1.79) | 0.021          |
| Age group (compared with adults)           |                   |                |
| Children                                   | 0.76 (0.65, 0.89) | 0.001          |
| Elderly                                    | 0.95 (0.78, 1.15) | 0.602          |
| All ages                                   | 0.55 (0.44, 0.68) | <0.001         |
| Single season                              | 0.57 (0.44, 0.73) | <0.001         |
| Viral shedding within 4 days               | 1.08 (0.89, 1.33) | 0.431          |
| Number of ORVs tested                      | 1.37 (1.08, 1.74) | 0.011          |
| Control group (compared with flu-negative) |                   |                |
| ORV-positive as control group              | 0.89 (0.72, 1.11) | 0.293          |
| pan-negative as control group              | 0.97 (0.79, 1.20) | 0.804          |
| <b>Multivariate analysis</b>               |                   |                |
| Setting (compared with inpatient)          |                   |                |
| Outpatient                                 | 1.32 (1.01, 1.71) | 0.040          |
| Mixed                                      | 1.73 (1.17, 2.55) | 0.006          |
| Age group (compared with adults)           |                   |                |
| Children                                   | 0.78 (0.66, 0.91) | 0.002          |
| Elderly                                    | 1.02 (0.82, 1.27) | 0.861          |
| All ages                                   | 0.88 (0.59, 1.32) | 0.540          |
| Single season                              | 0.40 (0.24, 0.67) | <0.001         |
| Control group (compared with flu-negative) |                   |                |
| ORV-positive as control group              | 0.92 (0.80, 1.06) | 0.235          |
| pan-negative as control group              | 0.99 (0.87, 1.14) | 0.925          |

ORV: other respiratory viruses; OR: odds ratio; CI: confidence interval
